# Supplementary material for: A series of pentanary inorganic supramolecular sulfides (A3X)[MB12(MS4)3] (A = K, Cs; X = Cl, Br, I; M = Ga, In, Gd) featuring B12S12clusters
Source: Royal Society of Chemistry journal article supplement (doi:10.1039/c7qi00396j), 2017-01-01
Supplement: c7qi00396j1.pdf [file c7qi00396j1.pdf]

## Supporting Information

### A series of pentanary inorganic supramolecular sulfides (A<sub>3</sub>X)[MB<sub>12</sub>(MS<sub>4</sub>)<sub>3</sub>] (A = Na, K, Cs; X = Cl, Br, I; M = Ga, In, Gd) featuring B<sub>12</sub>S<sub>12</sub> cluster

Z.-D. Sun, Y. Chi, H.-G. Xue and S.-P. Guo\*

*School of Chemistry & Chemical Engineering, Yangzhou University, Yangzhou,  
Jiangsu 225002, P. R. China*

**Table S1.** Selected bond distances (Å) for 1–6.<sup>a</sup>

| Bond         | Dist.     | Bond          | Dist.     |
|--------------|-----------|---------------|-----------|
| <b>1</b>     |           |               |           |
| In(1)–S(1)   | 2.672(19) | B(1)–B(2)     | 1.803(12) |
| In(1)–S(1)#1 | 2.672(19) | B(1)–B(2)#2   | 1.789(12) |
| In(1)–S(1)#2 | 2.672(19) | B(1)–B(2)#10  | 1.775(11) |
| In(1)–S(1)#3 | 2.672(19) | B(2)–B(1)#3   | 1.789(12) |
| In(1)–S(1)#4 | 2.672(19) | B(2)–B(1)#10  | 1.775(11) |
| In(1)–S(1)#5 | 2.672(19) | B(2)–B(2)#2   | 1.787(14) |
| In(2)–S(1)   | 2.515(2)  | B(2)–B(2)#10  | 1.775(11) |
| In(2)–S(1)#6 | 2.515(2)  | K(1)–S(1)     | 3.511(7)  |
| In(2)–S(2)   | 2.413(2)  | K(1)–S(1)#6   | 3.511(7)  |
| In(2)–S(2)#6 | 2.413(2)  | K(1)–S(2)#9   | 3.552(5)  |
| B(1)–S(2)    | 1.837(8)  | K(1)–S(2)#10  | 3.552(5)  |
| B(2)–S(1)    | 1.855(8)  | K(1)–Cl(1)    | 3.563(6)  |
| B(1)–B(1)#10 | 1.831(18) | K(1)–Cl(1)#11 | 3.563(6)  |
| B(1)–B(1)#13 | 1.763(16) |               |           |
| <b>2</b>     |           |               |           |
| In(1)–S(1)   | 2.671(3)  | B(1)–B(2)     | 1.80(2)   |
| In(1)–S(1)#1 | 2.671(3)  | B(1)–B(2)#2   | 1.82(2)   |
| In(1)–S(1)#2 | 2.671(3)  | B(1)–B(2)#10  | 1.78(18)  |
| In(1)–S(1)#3 | 2.671(3)  | B(2)–B(1)#5   | 1.82(2)   |
| In(1)–S(1)#4 | 2.671(3)  | B(2)–B(1)#10  | 1.78(18)  |
| In(1)–S(1)#5 | 2.671(3)  | B(2)–B(2)#10  | 1.83(3)   |
| In(2)–S(1)   | 2.514(4)  | B(2)–B(2)#12  | 1.77(3)   |

|              |           |               |           |
|--------------|-----------|---------------|-----------|
| In(2)–S(1)#6 | 2.514(4)  | K(1)–S(1)     | 3.473(9)  |
| In(2)–S(2)   | 2.409(4)  | K(1)–S(1)#6   | 3.473(9)  |
| In(2)–S(2)#6 | 2.409(4)  | K(1)–S(2)#10  | 3.519(7)  |
| B(1)–S(1)    | 1.855(14) | K(1)–S(2)#11  | 3.519(7)  |
| B(2)–S(2)    | 1.832(15) | K(1)–Br(1)    | 3.584(7)  |
| B(1)–B(1)#2  | 1.78(2)   | K(1)–Br(1)#9  | 3.584(7)  |
| B(1)–B(1)#5  | 1.78(2)   |               |           |
| <b>3</b>     |           |               |           |
| In(1)–S(1)   | 2.680(6)  | B(1)–B(2)     | 1.79(3)   |
| In(1)–S(1)#1 | 2.680(6)  | B(1)–B(2)#3   | 1.76(4)   |
| In(1)–S(1)#2 | 2.680(6)  | B(1)–B(2)#10  | 1.75(3)   |
| In(1)–S(1)#3 | 2.680(6)  | B(2)–B(1)#4   | 1.79(3)   |
| In(1)–S(1)#4 | 2.680(6)  | B(2)–B(1)#10  | 1.75(3)   |
| In(1)–S(1)#5 | 2.680(6)  | B(2)–B(2)#10  | 1.83(3)   |
| In(2)–S(1)   | 2.492(7)  | B(2)–B(2)#12  | 1.76(3)   |
| In(2)–S(1)#6 | 2.492(7)  | K(1)–S(1)     | 3.403(12) |
| In(2)–S(2)   | 2.399(6)  | K(1)–S(1)#6   | 3.403(12) |
| In(2)–S(2)#6 | 2.399(6)  | K(1)–S(2)#10  | 3.490(9)  |
| B(1)–S(1)    | 1.90(2)   | K(1)–S(2)#11  | 3.490(9)  |
| B(2)–S(2)    | 1.84(2)   | K(1)–I(1)     | 3.668(10) |
| B(1)–B(1)#3  | 1.76(4)   | K(1)–I(1)#9   | 3.668(10) |
| B(1)–B(1)#4  | 1.76(4)   |               |           |
| <b>4</b>     |           |               |           |
| In(1)–S(1)   | 2.679(4)  | B(1)–B(2)     | 1.80(2)   |
| In(1)–S(1)#1 | 2.679(4)  | B(1)–B(2)#4   | 1.82(2)   |
| In(1)–S(1)#2 | 2.679(4)  | B(1)–B(2)#13  | 1.79(2)   |
| In(1)–S(1)#3 | 2.679(4)  | B(2)–B(1)#5   | 1.82(2)   |
| In(1)–S(1)#4 | 2.679(4)  | B(2)–B(1)#13  | 1.79(2)   |
| In(1)–S(1)#5 | 2.679(4)  | B(2)–B(2)#13  | 1.85(4)   |
| In(2)–S(1)   | 2.543(4)  | B(2)–B(2)#15  | 1.78(4)   |
| In(2)–S(1)#6 | 2.543(4)  | Cs(1)–S(1) #7 | 5.078(3)  |
| In(2)–S(2)   | 2.419(4)  | Cs(1)–S(1)#8  | 5.078(3)  |
| In(2)–S(2)#6 | 2.419(4)  | Cs(1)–S(2)#13 | 3.568(4)  |
| B(1)–S(1)    | 1.874(16) | Cs(1)–S(2)#14 | 3.568(4)  |
| B(2)–S(2)    | 1.835(17) | Cs(1)–I(1)    | 3.714(15) |
| B(1)–B(1)#4  | 1.76(3)   | Cs(1)–I(1)#12 | 3.714(15) |
| B(1)–B(1)#5  | 1.76(3)   |               |           |
| <b>5</b>     |           |               |           |
| Ga(1)–S(2)   | 2.766(2)  | B(1)–B(2)     | 1.771(12) |
| Ga(1)–S(2)#1 | 2.766(2)  | B(1)–B(2)#2   | 1.796(12) |
| Ga(1)–S(2)#2 | 2.766(2)  | B(1)–B(2)#7   | 1.776(11) |
| Ga(1)–S(2)#3 | 2.766(2)  | B(2)–B(1)#5   | 1.776(11) |
| Ga(1)–S(2)#4 | 2.766(2)  | B(2)–B(1)#7   | 1.776(11) |

|              |           |              |           |
|--------------|-----------|--------------|-----------|
| Ga(1)–S(1)#5 | 2.766(2)  | B(2)–B(2)#2  | 1.784(14) |
| Ga(2)–S(1)   | 2.220(2)  | B(2)–B(2)#5  | 1.784(14) |
| Ga(2)–S(1)#6 | 2.220(2)  | K(1)–S(1) #7 | 3.556(3)  |
| Ga(2)–S(2)   | 2.319(2)  | K(1)–S(1)#8  | 3.556(3)  |
| Ga(2)–S(2)#6 | 2.319(2)  | K(1)–S(2)    | 3.265(4)  |
| B(1)–S(1)    | 1.854(9)  | K(1)–S(2)#6  | 3.265(4)  |
| B(2)–S(2)    | 1.865(8)  | K(1)–I(1)    | 3.611(3)  |
| B(1)–B(1)#7  | 1.831(17) | K(1)–I(1)#9  | 3.611(3)  |
| B(1)–B(1)#16 | 1.742(15) |              |           |

6

|               |          |               |          |
|---------------|----------|---------------|----------|
| Gd(1)–S(2)    | 2.790(3) | B(1)–B(2)     | 1.84(7)  |
| Gd(1)–S(2)#1  | 2.790(3) | B(1)–B(2)#4   | 1.77(5)  |
| Gd(1)–S(2)#2  | 2.790(3) | B(1)–B(2)#13  | 1.78(5)  |
| Gd(1)–S(2)#3  | 2.790(3) | B(2)–B(1)#2   | 1.79(4)  |
| Gd(1)–S(2)#4  | 2.790(3) | B(2)–B(1)#13  | 1.78(4)  |
| Gd(1)–S(2)#5  | 2.790(3) | B(2)–B(2)#2   | 1.79(4)  |
| Ga(1)–S(1)    | 2.229(2) | B(2)–B(2)#4   | 1.78(4)  |
| Ga(1)–S(1)#11 | 2.229(2) | K(1)–S(1) #12 | 1.81(4)  |
| Ga(1)–S(2)    | 2.344(3) | K(1)–S(1)#14  | 1.81(4)  |
| Ga(1)–S(2)#11 | 2.344(3) | K(1)–S(2)     | 3.558(4) |
| B(1)–S(1)     | 1.836(4) | K(1)–S(2)#11  | 3.558(4) |
| B(2)–S(2)     | 1.868(3) | K(1)–I(1) #6  | 3.272(4) |
| B(1)–B(1)#13  | 1.84(7)  | K(1)–I(1)#12  | 3.272(4) |
| B(1)–B(1)#16  | 1.77(5)  |               |          |

Symmetry codes: #1 1+y-x, +y, 3/2-z; #2 1+x-y, 1-x, +z; #3 1-y, +x-y, +z; #4 +x, +x-y, 3/2-z; #5 1-y, 1-x, 3/2-z; #6 -y+x, -y, 1-z; #7 2+y-x, 1-x, +z; #8 1-y, -1+x-y, +z; #9 1-x, -y, 1/2+z; #10 1+y-x, +y, 1/2-z; #11 -y+x, -1+x, -1/2+z; #12 1-x, -y, -1/2+z; #13 +x, +x-y, 1/2+z; #14 -y+x, -1+x, 1/2+z; #15 1+y, 1-x+y, 1/2+z; #16 2-x, -y, 1/2+z for **1**. #1 +x, +x-y, 1/2-z; #2 1-y, 1-y, +z; #3 1+y-x, 1-x, +z; #4 1+y-x, +y, 1/2-z; #5 1-y, 1-x, 1/2-z; #6 +y, +x, 1-z; #7 2-y, 1+x-y, +z; #8 1+y-x, 2-x, +z; #9 2-x, 2-y, -1/2+z; #10 1-x, 1-y, -1/2+z; #11 1-y, 1-x, 3/2-z; #12 +x, +x-y, 3/2-z; #13 +y, 1-x+y, 1/2+z; #14 1-y+x, +x, 1/2+z; #15 2-x, 2-y, 1/2+z; #16 1-x, 1-y, 1/2+z for **2**. #1 +x, 1+x-y, 3/2-z; #2 1-y, 1-x, 3/2-z; #3 1-y, 1-x, +z; #4 +y-x, +y, 3/2-z; #5 +y-x, 1-x, +z; #6 +y, +x, 1-z; #7 -y, +x-y, +z; #8 -y, +x-y, +z; #9 -x, -y, 1/2+z; #10 1-x, 1-y, 1/2+z; #11 1-y, 1-x, 1/2+z; #12 +x, 1+x-y, 1/2-z; #13 -x, -y, -1/2+z; #14 -y+x, +x, -1/2+z; #15 +y, -x+y, -1/2+z; #16 1-x, 1-y, -1/2+z for **3**. #1 +x, 1+x-y, 3/2-z; #2 1-y, 1+x-y, +z; #3 +y-x, +y, 3/2-z; #4 1-y, 1-x, 3/2-z; #5 +y-x, 1-x, +z; #6 +y, +x, 1-z; #7 -y, +x-y, +z; #8 -y, +x-y, +z; #9 +y, -x+y, -1/2+z; #10 -y+x, +x, -1/2+z; #11 +y, -x-y, 1/2+z; #12 -y+x, +x, 1/2+z; #13 1-y, 1-x, 1/2+z; #14 1-x, 1-y, 1/2+z; #15 +x, 1+x-y, 1/2-z; #16 -x, -y, -1/2+z; #17 1-x, 1-y, -1/2+z for **4**. #1 x, x-y+1, -z+1/2; #2 -x+y, -x+1, z; #3 -y+1, -x+1, -z+1/2; #4 -x+y, y, -z+1/2; #5 -y+1, x-y+1, z #6 -x, -x+y, -z+1; #7 x, x-y+1, -z+3/2; #8 -x, -y+1, z-1/2; #9 -x, -y, z-1/2 #10 -y, x-y, z; #11 -x+y, -x, z; #12 y, -x+y, z+1/2; #13 -x, -y, z+1/2; #14 x-y, x, z+1/2; #15 -x, -y+1, z+1/2; #16 -y+1, -x+1, -z+3/2 for **5**. #1 +x, 1+x-y, 1/2-z; #2 +y-x, 1-x, +z; #3 1-y, 1-x+y, +z; #4 1-y, 1-x, 1/2-z; #5 +y-x, +y, 1/2-z; #6 -y, +x-y, +z; #7 -y+x, +x, 1/2+z; #8 +y-x, -x, +z; #9 +y, -x+y, 1/2+z; #10 -x, -y, 1/2+z; #11 -x, -x+y, 1-z; #12 -x, -y, -1/2+z; #13 +x, 1+x-y, 3/2-z; #14 -x, 1-y, -1/2+z; #15 -x, 1-y, 1/2+z; #16 1-y, 1-x, 3/2-z for **6**.

**Table S2.** Atomic coordinates ( $\times 10^4$ ) and equivalent isotropic displacement parameters ( $U_{\text{eq}}^a$ ,  $\text{\AA}^2 \times 10^3$ ) for **1–6**.

| Atom     | <i>x</i>   | <i>y</i>   | <i>z</i> | $U_{\text{eq}}/\text{\AA}^2$ |
|----------|------------|------------|----------|------------------------------|
| <b>1</b> |            |            |          |                              |
| In1      | 6667       | 3333       | 7500     | 18.5(3)                      |
| In2      | 4723.1(6)  | 0          | 5000     | 25.4(2)                      |
| S1       | 6660(2)    | 1753.7(18) | 5656(2)  | 17.3(4)                      |
| S2       | 3974.1(18) | 704.4(18)  | 3075(2)  | 25.7(5)                      |
| B1       | 5380(8)    | 2065(7)    | 2842(8)  | 11.1(17)                     |
| B2       | 6663(8)    | 2549(8)    | 3973(9)  | 15.5(18)                     |
| K1       | 7921(6)    | 0          | 5000     | 234(6)                       |
| Cl1      | 10000      | 0          | 7500     | 189(8)                       |
| <b>2</b> |            |            |          |                              |
| In1      | 6667       | 3333       | 2500     | 15.1(6)                      |
| In2      | 4709.6(10) | 4709.6(10) | 5000     | 20.9(4)                      |
| S1       | 6657(4)    | 4907(3)    | 4346(4)  | 14.7(7)                      |
| S2       | 3957(3)    | 3256(4)    | 6922(4)  | 21.3(8)                      |
| B1       | 6647(15)   | 4106(13)   | 6027(15) | 10(3)                        |
| B2       | 5369(14)   | 3317(14)   | 7164(14) | 11(3)                        |
| K1       | 7895(7)    | 7895(7)    | 5000     | 126(3)                       |
| Br1      | 10000      | 10000      | 7500     | 86.0(18)                     |
| <b>3</b> |            |            |          |                              |
| In1      | 3333       | 6667       | 7500     | 30.3(12)                     |
| In2      | 5290.7(19) | 5290.7(19) | 5000     | 26.9(8)                      |
| S1       | 3366(6)    | 5101(5)    | 5654(6)  | 16.5(13)                     |
| S2       | 6036(6)    | 6738(6)    | 3094(6)  | 22.2(14)                     |
| B1       | 3360(20)   | 5910(20)   | 3930(20) | 9(5)                         |
| B2       | 4620(20)   | 6690(20)   | 2840(20) | 10(6)                        |
| K1       | 2181(10)   | 2181(10)   | 5000     | 94(4)                        |
| I1       | 0          | 0          | 2500     | 52.4(14)                     |
| <b>4</b> |            |            |          |                              |
| In1      | 3333       | 6667       | 7500     | 13.7(6)                      |
| In2      | 5279.4(11) | 5279.4(11) | 5000     | 16.8(4)                      |
| S1       | 3386(4)    | 5148(3)    | 5658(4)  | 11.3(8)                      |
| S2       | 5976(4)    | 6723(4)    | 3099(4)  | 18.3(9)                      |
| B1       | 3356(16)   | 5925(14)   | 3971(17) | 6(3)                         |
| B2       | 4610(15)   | 6686(16)   | 2835(16) | 11(4)                        |
| Cs1      | 2173.0(13) | 2173.0(13) | 5000     | 57.2(7)                      |
| I1       | 0          | 0          | 2500     | 35.9(7)                      |
| <b>5</b> |            |            |          |                              |
| Ga1      | 3333       | 6667       | 2500     | 29(1)                        |
| Ga2      | 0          | 5376(1)    | 5000     | 22(1)                        |
| S1       | 625(2)     | 6723(2)    | 6778(2)  | 15(1)                        |

|     |           |           |           |           |
|-----|-----------|-----------|-----------|-----------|
| S2  | 1603(2)   | 5083(2)   | 4420(2)   | 14(1)     |
| B1  | 2036(7)   | 6692(7)   | 7159(8)   | 9(2)      |
| B2  | 2512(8)   | 5874(8)   | 6054(8)   | 9(2)      |
| K1  | 0         | 2172(3)   | 5000      | 73(2)     |
| I1  | 0         | 0         | 7500      | 36(1)     |
|     |           | <b>6</b>  |           |           |
| Gd1 | 3333      | 6667      | 2500      | 26.07(9)  |
| Ga1 | 0         | 5397.1(3) | 5000      | 14.38(9)  |
| S1  | 640.2(5)  | 6732.8(5) | 6794.8(6) | 13.86(15) |
| S2  | 1600.3(5) | 5073.5(5) | 4435.8(7) | 12.60(15) |
| B1  | 2027(2)   | 6686(2)   | 7148(3)   | 10.7(7)   |
| B2  | 2509(2)   | 5860(2)   | 6068(3)   | 9.0(6)    |
| K1  | 0         | 2166.1(9) | 5000      | 62.3(4)   |
| I1  | 0         | 0         | 7500      | 34.36(12) |

<sup>a</sup> $U_{\text{eq}}$  is defined as one third of the trace of the orthogonalized  $U_{ij}$  tensor.

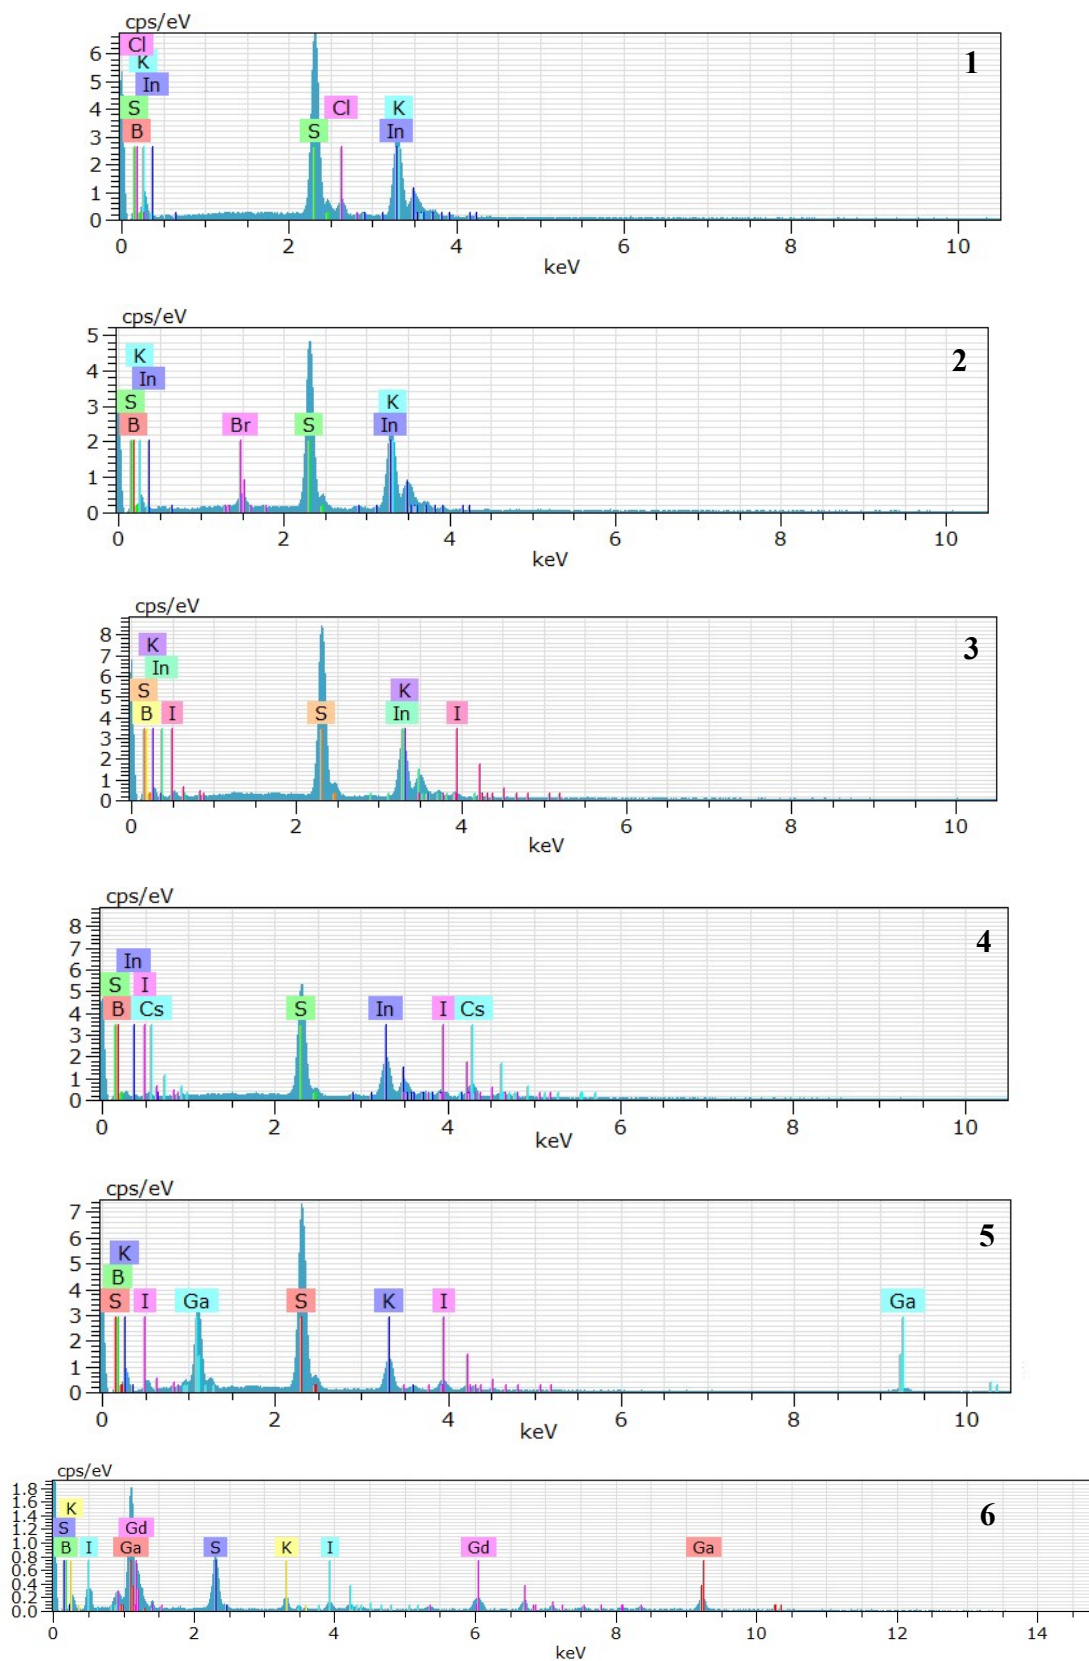

**Fig. S1.** EDS analyses for 1–6.

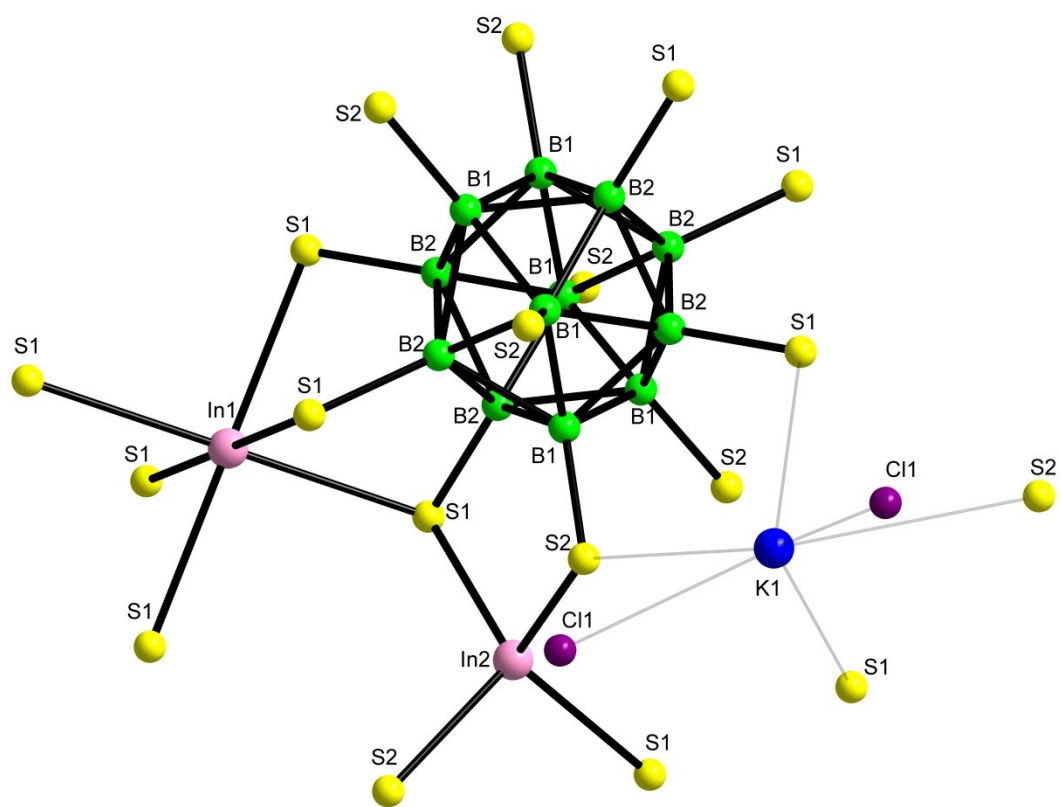

Fig. S2. Coordination geometry of 1.

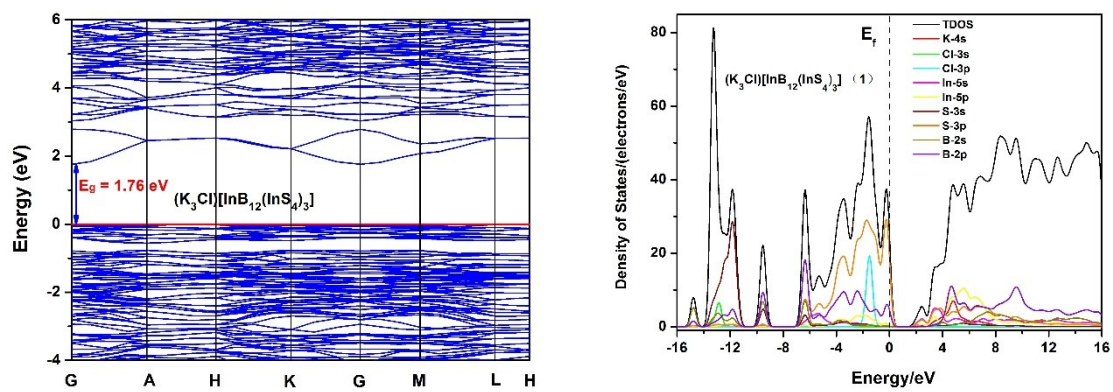

**Fig. S3.** Calculated band structure (left) and DOS (right) of **1**. The Fermi level is chosen as the energy reference at 0 eV.



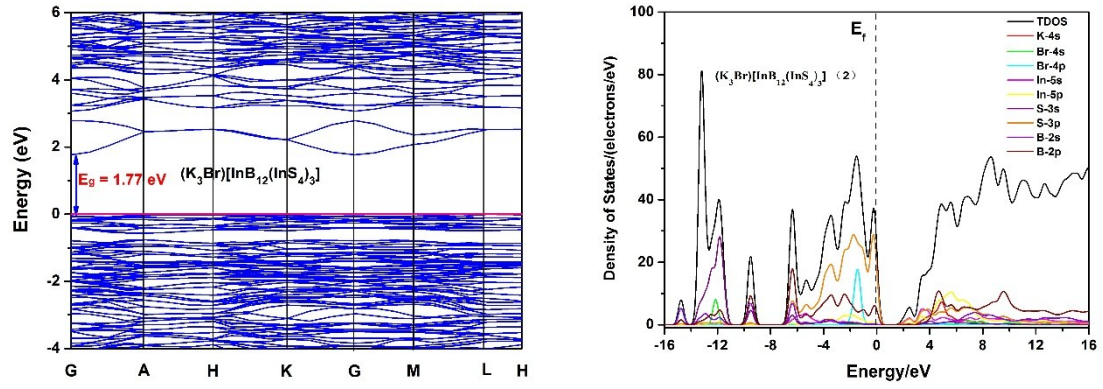

**Fig. S4.** Calculated band structure (left) and DOS (right) of **2**. The Fermi level is chosen as the energy reference at 0 eV.

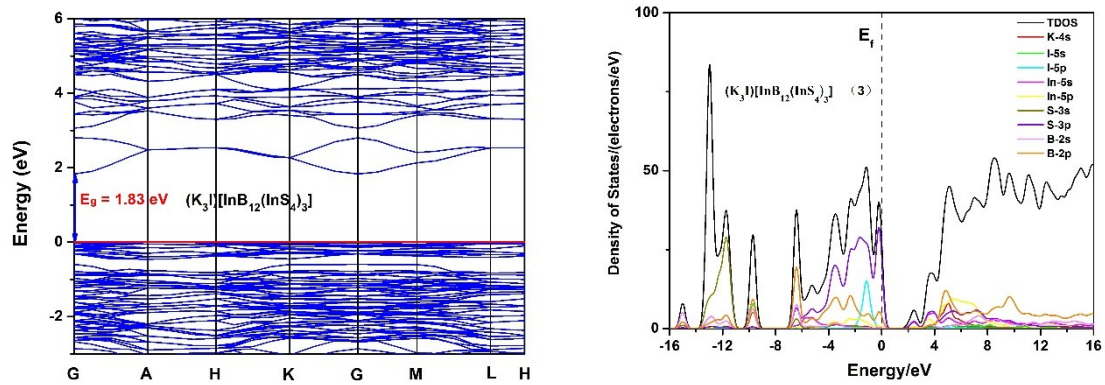

**Fig. S5.** Calculated band structure (left) and DOS (right) of **3**. The Fermi level is chosen as the energy reference at 0 eV.

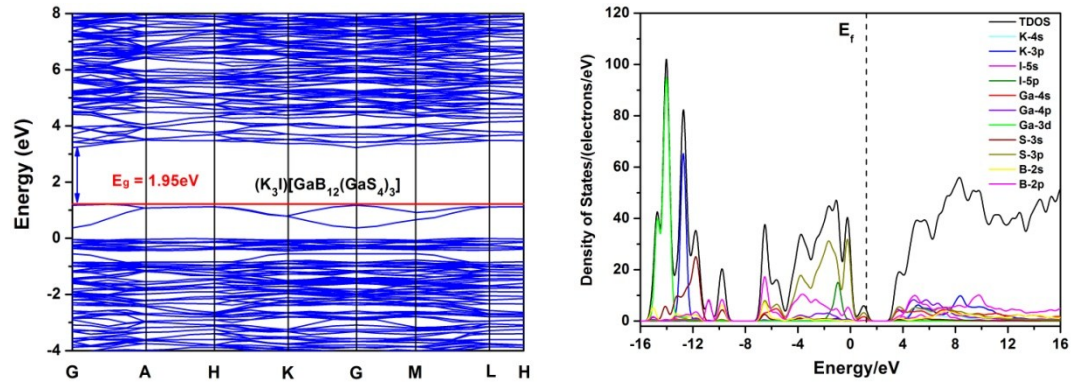

**Fig. S6.** Calculated band structure (left) and DOS (right) of **5**. The Fermi level is chosen as the energy reference at 0 eV.

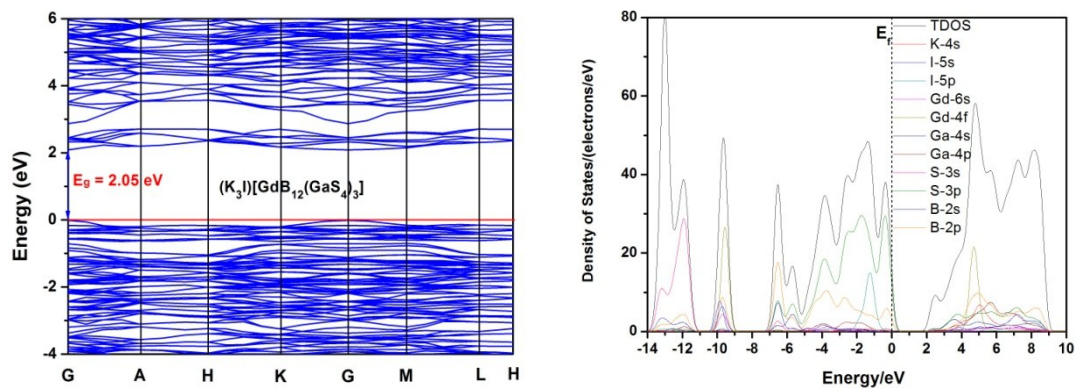

**Fig. S7.** Calculated band structure (left) and DOS (right) of **6**. The Fermi level is chosen as the energy reference at 0 eV.

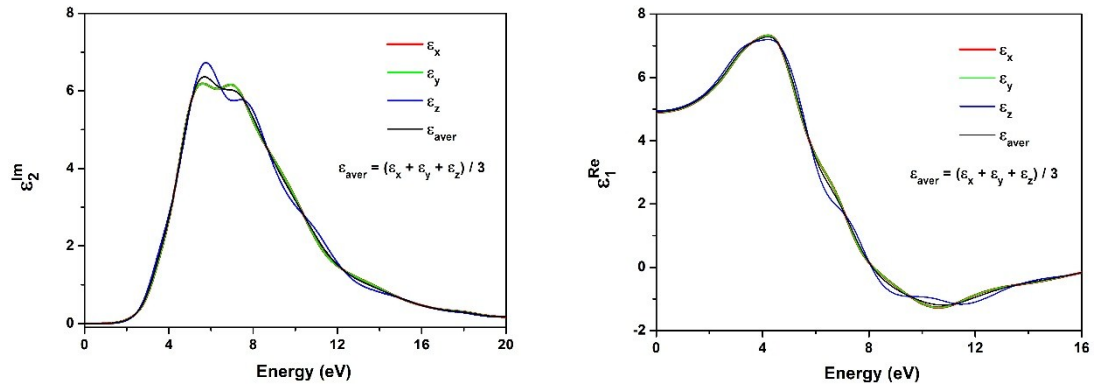

**Fig. S8.** Calculated real and imaginary parts of optical dielectric functions of **1** in different directions.

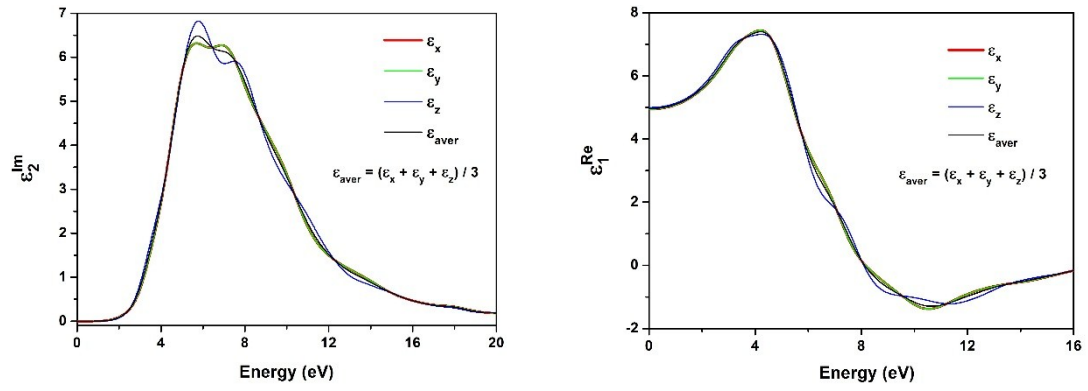

**Fig. S9.** Calculated real and imaginary parts of optical dielectric functions of **2** in different directions.

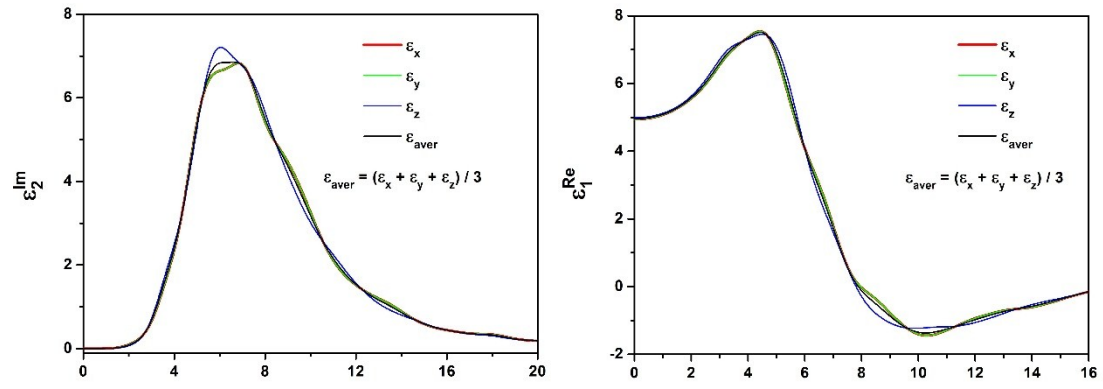

**Fig. S10.** Calculated real and imaginary parts of optical dielectric functions of **3** in different directions.

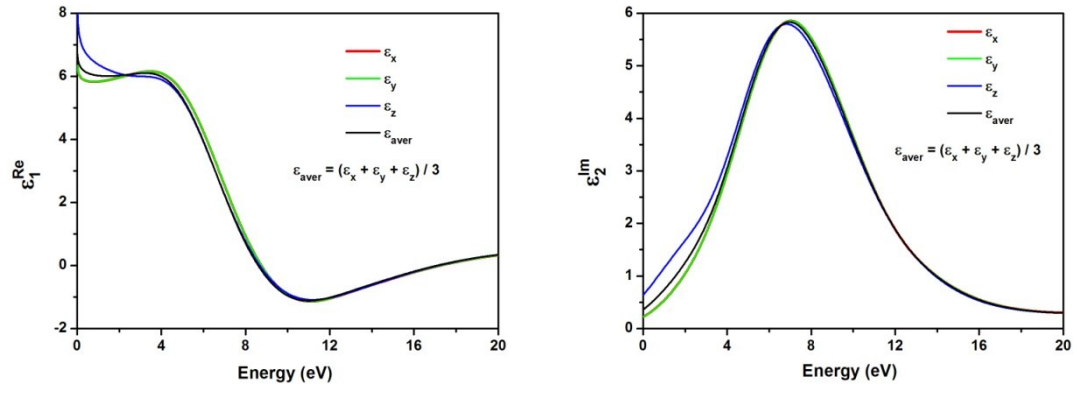

**Fig. S11.** Calculated real and imaginary parts of optical dielectric functions of **5** in different directions.



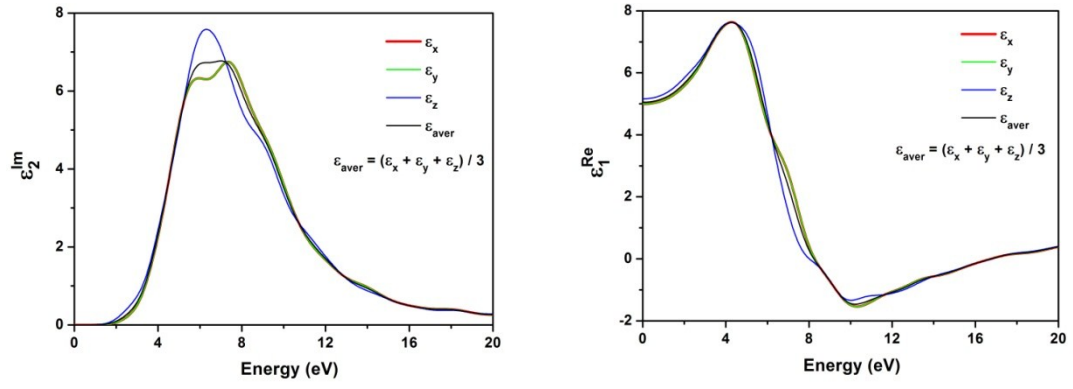

**Fig. S12.** Calculated real and imaginary parts of optical dielectric functions of **6** in different directions.
